# Supplementary material
Source: ML conference proceedings conference paper supplement (https://proceedings.neurips.cc/paper_files/paper/2015/hash/698d51a19d8a121ce581499d7b701668-Abstract.html)
Supplement: Supplementary file [file 698d51a19d8a121ce581499d7b701668-Supplemental.zip]

[35] L. Mackey and J. Gorham. Multivariate Stein factors for strongly log-concave distributions. *arXiv:1512.07392*, December 2015.

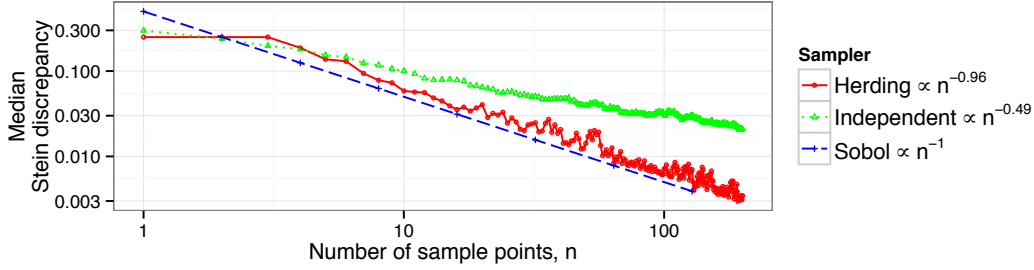

Figure 5: Comparison of complete graph Stein discrepancy convergence for  $P = \text{Unif}(0, 1)$ .

## A Proof of Proposition 1

Our integrability assumption together with the boundedness of  $g$  and  $\nabla g$  imply that  $\mathbb{E}_P[\langle \nabla, g(Z) \rangle]$  and  $\mathbb{E}_P[\langle g(Z), \nabla \log p(Z) \rangle]$  exist. Define the  $\ell_\infty$  ball of radius  $r$ ,  $\mathbb{B}_r = \{x \in \mathbb{R}^d : \|x\|_\infty \leq r\}$ . Since  $\mathcal{X}$  is convex, the intersection  $\mathcal{X} \cap \mathbb{B}_r$  is compact and convex with Lipschitz boundary  $\partial(\mathcal{X} \cap \mathbb{B}_r)$ . Thus, the divergence theorem (integration by parts) implies that

$$\begin{aligned} \mathbb{E}_P[(\mathcal{T}_P g)(Z)] &= \mathbb{E}_P[\langle \nabla, g(Z) \rangle + \langle g(Z), \nabla \log p(Z) \rangle] = \int_{\mathcal{X}} \langle \nabla, p(z)g(z) \rangle dz \\ &= \lim_{r \rightarrow \infty} \int_{\mathcal{X} \cap \mathbb{B}_r} \langle \nabla, p(z)g(z) \rangle dz = \lim_{r \rightarrow \infty} \int_{\partial(\mathcal{X} \cap \mathbb{B}_r)} \langle g(z), n_r(z) \rangle p(z) dz \end{aligned}$$

for  $n_r$  the outward unit normal vector to  $\partial(\mathcal{X} \cap \mathbb{B}_r)$ . The final quantity in this expression equates to zero, as  $\langle g(x), n(x) \rangle = 0$  for all  $x$  on the boundary  $\partial\mathcal{X}$ ,  $g$  is bounded, and  $\lim_{m \rightarrow \infty} p(x_m) = 0$  for any  $(x_m)_{m=1}^\infty$  with  $x_m \in \mathcal{X}$  for all  $m$  and  $\|x_m\|_\infty \rightarrow \infty$ .

## B Proof of Theorem 2: Stein Discrepancy Lower Bound for Strongly Log-concave Densities

We let  $C^k(\mathcal{X})$  denote the set of real-valued functions on  $\mathcal{X}$  with  $k$  continuous derivatives and  $d_{\mathcal{M}_{\|\cdot\|}}$  denote the *smooth function distance*, the IPM generated by

$$\mathcal{M}_{\|\cdot\|} \triangleq \left\{ h \in C^3(\mathcal{X}) \mid \sup_{x \in \mathcal{X}} \max(\|\nabla h(x)\|^*, \|\nabla^2 h(x)\|^*, \|\nabla^3 h(x)\|^*) \leq 1 \right\}.$$

We additionally define the operator norms  $\|v\|_{op} \triangleq \|v\|_2$  for vectors  $v \in \mathbb{R}^d$ ,  $\|M\|_{op} \triangleq \sup_{v \in \mathbb{R}^d: \|v\|_2=1} \|Mv\|_2$  for matrices  $M \in \mathbb{R}^{d \times d}$ , and  $\|T\|_{op} \triangleq \sup_{v \in \mathbb{R}^d: \|v\|_2=1} \|T[v]\|_{op}$  for tensors  $T \in \mathbb{R}^{d \times d \times d}$ .

The following result, proved in the companion paper [35], establishes the existence of explicit constants (*Stein factors*)  $c_1, c_2, c_3 > 0$ , such that, for any test function  $h \in \mathcal{M}_{\|\cdot\|}$ , the *Stein equation*

$$h(x) - \mathbb{E}_P[h(Z)] = (\mathcal{T}_P g_h)(x)$$

has a solution  $g_h = \frac{1}{2} \nabla u_h$  belonging to the non-uniform Stein set  $\mathcal{G}_{\|\cdot\|}^{c_1:3}$ .

**Theorem 7** (Stein Factors for Strongly Log-concave Densities [35, Theorem 2.1]). *Suppose that  $\mathcal{X} = \mathbb{R}^d$  and that  $\log p \in C^4(\mathcal{X})$  is  $k$ -strongly concave with*

$$\sup_{z \in \mathcal{X}} \|\nabla^3 \log p(z)\|_{op} \leq L_3 \quad \text{and} \quad \sup_{z \in \mathcal{X}} \|\nabla^4 \log p(z)\|_{op} \leq L_4.$$

*For each  $x \in \mathcal{X}$ , let  $(Z_{t,x})_{t \geq 0}$  represent the overdamped Langevin diffusion with infinitesimal generator*

$$(\mathcal{A}u)(x) = \frac{1}{2} \langle \nabla u(x), \nabla \log p(x) \rangle + \frac{1}{2} \langle \nabla, \nabla u(x) \rangle \quad (9)$$

and initial state  $Z_{0,x} = x$ . Then, for each  $h \in C^3(\mathcal{X})$  with bounded first, second, and third derivatives, the function

$$u_h(x) \triangleq \int_0^\infty \mathbb{E}_P[h(Z)] - \mathbb{E}[h(Z_{t,x})] dt$$

solves the the Stein equation

$$h(x) - \mathbb{E}_P[h(Z)] = (\mathcal{A}u_h)(x) \quad (10)$$

and satisfies

$$\begin{aligned} \sup_{z \in \mathcal{X}} \|\nabla u_h(z)\|_2 &\leq \frac{2}{k} \sup_{z \in \mathcal{X}} \|\nabla h(z)\|_2, \\ \sup_{z \in \mathcal{X}} \|\nabla^2 u_h(z)\|_{op} &\leq \frac{2L_3}{k^2} \sup_{z \in \mathcal{X}} \|\nabla h(z)\|_2 + \frac{1}{k} \sup_{z \in \mathcal{X}} \|\nabla^2 h(z)\|_{op}, \text{ and} \\ \sup_{z, y \in \mathcal{X}, z \neq y} \frac{\|\nabla^2 u_h(z) - \nabla^2 u_h(y)\|_{op}}{\|z - y\|_2} &\leq \frac{6L_3^2}{k^3} \sup_{z \in \mathcal{X}} \|\nabla h(z)\|_2 + \frac{L_4}{k^2} \sup_{z \in \mathcal{X}} \|\nabla h(z)\|_2 \\ &\quad + \frac{3L_3}{k^2} \sup_{z \in \mathcal{X}} \|\nabla^2 h(z)\|_{op} + \frac{2}{3k} \sup_{z \in \mathcal{X}} \|\nabla^3 h(z)\|_{op}. \end{aligned}$$

Hence, by the equivalence of non-uniform Stein discrepancies (Proposition 4),  $d_{\mathcal{M}_{\|\cdot\|}}(\mu, P) \leq \mathcal{S}(\mu, \mathcal{T}_P, \mathcal{G}_{\|\cdot\|}^{c_{1:3}}) \leq \max(c_1, c_2, c_3) \mathcal{S}(\mu, \mathcal{T}_P, \mathcal{G}_{\|\cdot\|})$  for any probability measure  $\mu$ .

The desired result now follows from Lemma 8, which implies that the Wasserstein distance  $d_{\mathcal{W}_{\|\cdot\|}}(\mu_m, P) \rightarrow 0$  whenever  $d_{\mathcal{M}_{\|\cdot\|}}(\mu_m, P) \rightarrow 0$  for a sequence of probability measures  $(\mu_m)_{m \geq 1}$ .

**Lemma 8** (Smooth-Wasserstein Inequality). *If  $\mu$  and  $\nu$  are probability measures on  $\mathbb{R}^d$ , and  $\|v\| \geq \|v\|_2$  for all  $v \in \mathbb{R}^d$ , then*

$$d_{\mathcal{M}_{\|\cdot\|}}(\mu, \nu) \leq d_{\mathcal{W}_{\|\cdot\|}}(\mu, \nu) \leq 3 \max\left(d_{\mathcal{M}_{\|\cdot\|}}(\mu, \nu), \sqrt[3]{d_{\mathcal{M}_{\|\cdot\|}}(\mu, \nu) \sqrt{2} \mathbb{E}[\|G\|^2]}\right).$$

for  $G$  a standard normal random vector in  $\mathbb{R}^d$ .

Lemma 2.2 of the companion paper [35] establishes this result for the case  $\|\cdot\| = \|\cdot\|_2$ ; we omit the proof of the generalization which closely mirrors that of the Euclidean norm case.

## C Proof of Proposition 3: Stein Discrepancy Upper Bound

Fix any  $g$  in  $\mathcal{G}_{\|\cdot\|}$ . By Proposition 1,  $\mathbb{E}[(\mathcal{T}_P g)(Z)] = 0$ . The Lipschitz and boundedness constraints on  $g$  and  $\nabla g$  now yield

$$\begin{aligned} \mathbb{E}_Q[(\mathcal{T}_P g)(X)] &= \mathbb{E}[(\mathcal{T}_P g)(X) - (\mathcal{T}_P g)(Z)] \\ &= \mathbb{E}[\langle g(X), \nabla \log p(X) \rangle - \langle g(Z), \nabla \log p(Z) \rangle + \langle \nabla, g(X) - g(Z) \rangle] \\ &= \mathbb{E}[\langle g(X), \nabla \log p(X) - \nabla \log p(Z) \rangle + \langle g(X) - g(Z), \nabla \log p(Z) \rangle] \\ &\quad + \mathbb{E}[\langle \nabla, g(X) - g(Z) \rangle] \\ &\leq \mathbb{E}[\|\nabla \log p(X) - \nabla \log p(Z)\|] + \mathbb{E}[\|\nabla \log p(Z)(X - Z)^\top\|] + \mathbb{E}[\|X - Z\|]. \end{aligned}$$

To derive the second advertised inequality, we use the definition of the matrix norm, the Fenchel-Young inequality for dual norms, the definition of the matrix dual norm, and the Cauchy-Schwarz inequality in turn:

$$\begin{aligned} \mathbb{E}[\|\nabla \log p(Z)(X - Z)^\top\|] &= \mathbb{E}\left[\sup_{M: \|M\|^* = 1} \langle \nabla \log p(Z), M(X - Z) \rangle\right] \\ &\leq \mathbb{E}\left[\sup_{M: \|M\|^* = 1} \|\nabla \log p(Z)\| \|M(X - Z)\|^*\right] \\ &\leq \mathbb{E}[\|\nabla \log p(Z)\| \|X - Z\|] \leq \sqrt{\mathbb{E}[\|\nabla \log p(Z)\|^2] \mathbb{E}[\|X - Z\|^2]}. \end{aligned}$$

Since our bounds hold uniformly for all  $g$  in  $\mathcal{G}_{\|\cdot\|}$ , the proof is complete.

## D Proof of Proposition 4: Equivalence of Non-uniform Stein Discrepancies

Fix any  $c_1, c_2, c_3 > 0$ , and let  $c_{\max} = \max(c_1, c_2, c_3)$  and  $c_{\min} = \min(c_1, c_2, c_3)$ . Since the Stein discrepancy objective is linear in  $g$ , we have  $a\mathcal{S}(Q, \mathcal{T}_P, \mathcal{G}_{\|\cdot\|}) = \mathcal{S}(Q, \mathcal{T}_P, a\mathcal{G}_{\|\cdot\|})$  for any  $a > 0$ . The result now follows from the observation that  $c_{\min}\mathcal{G}_{\|\cdot\|} \subseteq \mathcal{G}_{\|\cdot\|}^{c_{1:3}} \subseteq c_{\max}\mathcal{G}_{\|\cdot\|}$ .

## E Proof of Proposition 5: Equivalence of Classical and Complete Graph Stein Discrepancies

The first inequality follows from the fact that  $\mathcal{G}_{\|\cdot\|} \subseteq \mathcal{G}_{\|\cdot\|, Q, G_1}$ . By the Whitney-Glaeser extension theorem [16, Thm. 1.4] of Glaeser [15], for every function  $g \in \mathcal{G}_{\|\cdot\|, Q, G_1}$ , there exists a function  $\tilde{g} \in \kappa_d \mathcal{G}_{\|\cdot\|}^*$  with  $g(x_i) = \tilde{g}(x_i)$  and  $\nabla g(x_i) = \nabla \tilde{g}(x_i)$  for all  $x_i$  in the support of  $Q$ . Here  $\kappa_d$  is a constant, independent of  $(Q, P)$ , depending only on the dimension  $d$  and norm  $\|\cdot\|$ . Since the Stein discrepancy objective is linear in  $g$  and depends on  $g$  only through the values  $g(x_i)$  and  $\nabla g(x_i)$ , we have  $\mathcal{S}(Q, \mathcal{T}_P, \mathcal{G}_{\|\cdot\|, Q, G_1}) \leq \mathcal{S}(Q, \mathcal{T}_P, \kappa_d \mathcal{G}_{\|\cdot\|}) = \kappa_d \mathcal{S}(Q, \mathcal{T}_P, \mathcal{G}_{\|\cdot\|})$ .

## F Proof of Proposition 6: Equivalence of Spanner and Complete Graph Stein Discrepancies

The first inequality follows from the fact that  $\mathcal{G}_{\|\cdot\|, Q, G_1} \subseteq \mathcal{G}_{\|\cdot\|, Q, G_t}$ . Fix any  $g \in \mathcal{G}_{\|\cdot\|, Q, G_t}$  and any pair of points  $z, z' \in \text{supp}(Q)$ . By the definition of  $\mathcal{G}_{\|\cdot\|, Q, G_t}$ , we have  $\max(\|g(z)\|^*, \|\nabla g(z)\|^*) \leq 1$ . By the  $t$ -spanner property, there exists a sequence of points  $z_0, z_1, z_2, \dots, z_{L-1}, z_L \in \text{supp}(Q)$  with  $z_0 = z$  and  $z_L = z'$  for which  $(z_{l-1}, z_l) \in E$  for all  $1 \leq l \leq L$  and  $\sum_{l=1}^L \|z_{l-1} - z_l\| \leq t\|z_0 - z_L\|$ . Since  $\max\left(\frac{\|g(z_{l-1}) - g(z_l)\|^*}{\|z_{l-1} - z_l\|}, \frac{\|\nabla g(z_{l-1}) - \nabla g(z_l)\|^*}{\|z_{l-1} - z_l\|}\right) \leq 1$  for each  $l$ , the triangle inequality implies that

$$\|\nabla g(z_0) - \nabla g(z_L)\|^* \leq \sum_{l=1}^L \|\nabla g(z_{l-1}) - \nabla g(z_l)\|^* \leq \sum_{l=1}^L \|z_{l-1} - z_l\| \leq t\|z_0 - z_L\|.$$

Identical reasoning establishes that  $\|g(z_0) - g(z_L)\|^* \leq t\|z_0 - z_L\|$ .

Furthermore, since  $\|g(z_{l-1}) - g(z_l) - \nabla g(z_l)(z_{l-1} - z_l)\|^* \leq \frac{1}{2}\|z_{l-1} - z_l\|^2$  for each  $l$ , the triangle inequality and the definition of the tensor norm  $\|\cdot\|^*$  imply that

$$\begin{aligned} & \|g(z_0) - g(z_L) - \nabla g(z_L)(z_0 - z_L)\|^* \\ & \leq \sum_{l=1}^L \|g(z_{l-1}) - g(z_l) - \nabla g(z_l)(z_{l-1} - z_l)\|^* + \|(\nabla g(z_l) - \nabla g(z_L))(z_{l-1} - z_l)\|^* \\ & \leq \sum_{l=1}^L \frac{1}{2}\|z_{l-1} - z_l\|^2 + \|\nabla g(z_l) - \nabla g(z_L)\|^* \|z_{l-1} - z_l\| \\ & \leq \sum_{l=1}^L \frac{1}{2}\|z_{l-1} - z_l\|^2 + \sum_{l'=l}^{L-1} \|\nabla g(z_{l'}) - \nabla g(z_{l'+1})\|^* \|z_{l-1} - z_l\| \\ & \leq \sum_{l=1}^L \|z_{l-1} - z_l\| \left( \frac{1}{2}\|z_{l-1} - z_l\| + \sum_{l'=l}^{L-1} \|z_{l'} - z_{l'+1}\| \right) \leq \left( \sum_{l=1}^L \|z_{l-1} - z_l\| \right)^2 \leq t^2\|z_0 - z_L\|^2. \end{aligned}$$

Since  $z, z'$  were arbitrary, and the Stein discrepancy objective is linear in  $g$ , we conclude that  $\mathcal{S}(Q, \mathcal{T}_P, \mathcal{G}_{\|\cdot\|, Q, G_t}) \leq \mathcal{S}(Q, \mathcal{T}_P, 2t^2 \mathcal{G}_{\|\cdot\|, Q, G_1}) = 2t^2 \mathcal{S}(Q, \mathcal{T}_P, \mathcal{G}_{\|\cdot\|, Q, G_1})$ .

## G Finite-dimensional Classical Stein Program

**Theorem 9** (Finite-dimensional Classical Stein Program). *If  $\mathcal{X} = (\alpha, \beta)$  for  $-\infty \leq \alpha < \beta \leq \infty$ , and  $x_{(1)} < \dots < x_{(n')}$  represent the sorted values of  $\{x_1, \dots, x_n, \alpha, \beta\} \cap \mathbb{R}$ , then the non-uniform*

classical Stein discrepancy  $\mathcal{S}(Q, \mathcal{T}_P, \mathcal{G}_{\|\cdot\|}^{c_{1:3}})$  is the optimal value of the convex program

$$\max_g \sum_{i=1}^{n'} q(x_{(i)}) \frac{d}{dx} \log p(x_{(i)}) g(x_{(i)}) + q(x_{(i)}) g'(x_{(i)}) \quad (11a)$$

$$\text{s.t. } \forall i \in \{1, \dots, n' - 1\}, |g'(x_{(i)})| \leq c_2, |g(x_{(i+1)}) - g(x_{(i)})| \leq c_2(x_{(i+1)} - x_{(i)}), \quad (11b)$$

$$\begin{aligned} & g(x_{(i)}) - g(x_{(i+1)}) + \frac{1}{4c_3} (g'(x_{(i)}) - g'(x_{(i+1)}))^2 + \frac{x_{(i+1)} - x_{(i)}}{2} (g'(x_{(i)}) + g'(x_{(i+1)})) \\ & + \frac{1}{c_3} (L_b)_+^2 \leq \frac{c_3}{4} (x_{(i+1)} - x_{(i)})^2, \end{aligned} \quad (11c)$$

$$\begin{aligned} & g(x_{(i+1)}) - g(x_{(i)}) + \frac{1}{4c_3} (g'(x_{(i)}) - g'(x_{(i+1)}))^2 - \frac{x_{(i+1)} - x_{(i)}}{2} (g'(x_{(i)}) + g'(x_{(i+1)})) \\ & + \frac{1}{c_3} (L_u)_+^2 \leq \frac{c_3}{4} (x_{(i+1)} - x_{(i)})^2, \quad \text{and} \end{aligned} \quad (11d)$$

$$\forall i \in \{1, \dots, n'\}, |g(x_{(i)})| \leq \mathbb{I}[\alpha < x_{(i)} < \beta] (c_1 - \frac{1}{2c_3} g'(x_{(i)})^2) \quad (11e)$$

where  $(r)_+ \triangleq \max(r, 0)$ ,

$$\begin{aligned} L_b &\triangleq \frac{c_3}{2} (x_{(i+1)} - x_{(i)}) - \frac{1}{2} (g'(x_{(i)}) + g'(x_{(i+1)})) - c_2, \quad \text{and} \\ L_u &\triangleq \frac{c_3}{2} (x_{(i+1)} - x_{(i)}) + \frac{1}{2} (g'(x_{(i)}) + g'(x_{(i+1)})) - c_2. \end{aligned}$$

We say the program (11) is finite-dimensional, because it suffices to optimize over vectors  $\gamma, \Gamma \in \mathbb{R}^{n'}$  representing the function values ( $\gamma_i = g(x_{(i)})$ ) and derivative values ( $\Gamma_i = g'(x_{(i)})$ ) at each sample or boundary point  $x_{(i)}$ . Indeed, by introducing slack variables, this program is representable as a convex quadratically constrained quadratic program with  $O(n)$  constraints,  $O(n)$  variables, and a linear objective. Moreover, the pairwise constraints in this program are only enforced between neighboring points in the sequence of ordered locations  $x_{(i)}$ . Hence the resulting constraint matrix is sparse and banded, making the problem particularly amenable to efficient optimization.

**Proof** Throughout, we say that  $\tilde{g}$  is an extension of  $g$  if  $\tilde{g}(x_{(i)}) = g(x_{(i)})$  and  $\tilde{g}'(x_{(i)}) = g'(x_{(i)})$  for each  $x_{(i)} \in \text{supp}(Q)$ . Since the Stein objective only depends on  $g$  and  $g'$  through their values at sample points,  $g$  and any extension  $\tilde{g}$  have identical objective values.

We will establish our result by showing that every  $g \in \mathcal{G}_{\|\cdot\|}^{c_{1:3}}$  is feasible for the program (11), so that  $\mathcal{S}(Q, \mathcal{T}_P, \mathcal{G}_{\|\cdot\|}^{c_{1:3}})$  lower bounds the optimum of (11), and that every feasible  $g$  for (11) has an extension in  $\tilde{g} \in \mathcal{G}_{\|\cdot\|}^{c_{1:3}}$ , so that  $\mathcal{S}(Q, \mathcal{T}_P, \mathcal{G}_{\|\cdot\|}^{c_{1:3}})$  also upper bounds the optimum of (11).

### G.1 Feasibility of $\mathcal{G}_{\|\cdot\|}^{c_{1:3}}$

Fix any  $g \in \mathcal{G}_{\|\cdot\|}^{c_{1:3}}$ . Also, since  $g'$  is  $c_2$ -bounded and  $c_3$ -Lipschitz, the constraints (11b) must be satisfied. Consider now the  $c_2$ -bounded and  $c_3$ -Lipschitz extensions of  $g'$

$$\begin{aligned} B(t) &\triangleq \max(-c_2, \max_{1 \leq i \leq n'} [g'(x_{(i)}) - c_3|t - x_{(i)}|]) \quad \text{and} \\ U(t) &\triangleq \min(c_2, \min_{1 \leq i \leq n'} [g'(x_{(i)}) + c_3|t - x_{(i)}|]). \end{aligned}$$

We know that  $B(t) \leq g'(t) \leq U(t)$  for all  $t$ , for, if not, there would be a point  $t_0$  and a point  $x_{(i)}$  such that  $|g'(x_{(i)}) - g'(t_0)| > c_3|x_{(i)} - t_0|$ , which combined with the  $c_3$ -Lipschitz property would be a contradiction. Thus, for each sample  $x_{(i)}$ , the fundamental theorem of calculus gives

$$g(x_{(i+1)}) - g(x_{(i)}) = \int_{x_{(i)}}^{x_{(i+1)}} g'(t) dt \geq \int_{x_{(i)}}^{x_{(i+1)}} B(t) dt.$$

The right-hand side of this inequality evaluates precisely to the right-hand side of the constraint (11c). An analogous upper bound using  $U(t)$  yields (11d).

Finally, consider any point  $x_{(i)}$ . If  $x_{(i)} \in \{\alpha, \beta\}$ , then (11e) is satisfied as  $g(z) = 0$  for any point  $z$  on the boundary. Suppose instead that  $\alpha < x_{(i)} < \beta$ . Without loss of generality, we may assume

that  $g'(x_{(i)}) \geq 0$ . Since  $g'$  is  $c_3$ -Lipschitz, we have  $g'(t) \geq g'(x_{(i)}) - c_3|t - x_{(i)}|$  for all  $t$ . Integrating both sides of this inequality from  $x_{(i)}$  to  $x_u = x_{(i)} + g'(x_{(i)})/c_3$ , we obtain

$$g(x_u) - g(x_{(i)}) = \int_{x_{(i)}}^{x_u} g'(t) dt \geq \int_{x_{(i)}}^{x_u} g'(x_{(i)}) - c_3(t - x_{(i)}) dt = g'(x_{(i)})^2 / (2c_3)$$

Since  $g(x_u) \leq c_1$ , we have  $\frac{1}{2c_3}g'(x_{(i)})^2 + g(x_{(i)}) \leq c_1$ . Similarly, by integrating the inequality from  $x_b = x_{(i)} - g'(x_{(i)})/c_3$  to  $x_{(i)}$ , we have  $g(x_b) - g(x_{(i)}) \geq g'(x_{(i)})^2 / (2c_3)$ , which combined with  $g(x_b) \leq c_1$  yields (11e).

## G.2 Extending Feasible Solutions

Suppose now that  $g$  is any function feasible for the program (11). We will construct an extension  $\tilde{g} \in \mathcal{G}_{\|\cdot\|}^{c_{1:3}}$  by first working independently over each interval  $(x_{(i)}, x_{(i+1)})$ . Fix an index  $i < n'$ . Our strategy is to identify a pair of  $c_2$ -bounded,  $c_3$ -Lipschitz functions  $m_i$  and  $M_i$  defined on the interval  $[x_{(i)}, x_{(i+1)}]$  which satisfy  $m_i(x) \leq M_i(x)$  for all  $x \in [x_{(i)}, x_{(i+1)}]$ ,  $m_i(x) = M_i(x) = g'(x)$  for  $x \in \{x_{(i)}, x_{(i+1)}\}$ , and  $\int_{x_{(i)}}^{x_{(i+1)}} m_i(t) dt \leq g(x_{(i+1)}) - g(x_{(i)}) \leq \int_{x_{(i)}}^{x_{(i+1)}} M_i(t) dt$ . For any such  $(m_i, M_i)$  pair, there exists  $\zeta_i \in [0, 1]$  satisfying

$$g(x_{(i+1)}) - g(x_{(i)}) = \int_{x_{(i)}}^{x_{(i+1)}} \zeta_i m_i(t) + (1 - \zeta_i) M_i(t) dt,$$

and hence we will define the extension

$$\tilde{g}(x) = g(x_{(i)}) + \int_{x_{(i)}}^x \zeta_i m_i(t) + (1 - \zeta_i) M_i(t) dt.$$

By convexity, the extension derivative  $\tilde{g}'$  is  $c_2$ -bounded and  $c_3$ -Lipschitz, so we will only need to check that  $\sup_{x \in \mathcal{X}} |\tilde{g}(x)| \leq c_1$ . The maximum magnitude values of  $\tilde{g}$  occur either at the interval endpoints, which are  $c_1$ -bounded by (11e), or at critical points  $x$  satisfying  $\tilde{g}'(x) = 0$ , so it suffices to ensure that  $\tilde{g}$  is  $c_1$ -bounded at all critical points.

We will use the  $c_2$ -bounded,  $c_3$ -Lipschitz functions  $B$  and  $U$  as building blocks for our extension, since they satisfy  $B(t) = U(t) = g'(t)$  for  $t \in \{x_{(i)}, x_{(i+1)}\}$  and  $B(t) \leq g'(t) \leq U(t)$ ,

$$B(t) = \max(-c_2, g'(x_{(i)}) - c_3(t - x_{(i)}), g'(x_{(i+1)}) - c_3(x_{(i+1)} - t)), \quad \text{and} \\ U(t) = \min(c_2, g'(x_{(i)}) + c_3(t - x_{(i)}), g'(x_{(i+1)}) + c_3(x_{(i+1)} - t)),$$

for  $t \in [x_{(i)}, x_{(i+1)}]$ . We need only consider three cases.

**Case 1:  $B$  and  $U$  are never negative or never positive on  $[x_{(i)}, x_{(i+1)}]$ .** For this case, we will choose  $m_i = B$  and  $M_i = U$ . By (11c) and (11d) we know  $\int_{x_{(i)}}^{x_{(i+1)}} m_i(t) dt \leq g(x_{(i+1)}) - g(x_{(i)}) \leq \int_{x_{(i)}}^{x_{(i+1)}} M_i(t) dt$ . Since  $B$  and  $U$  never change signs,  $\tilde{g}$  will be monotonic and hence  $c_1$ -bounded for any choice of  $\zeta_i$ .

**Case 2: Exactly one of  $B$  and  $U$  changes sign on  $[x_{(i)}, x_{(i+1)}]$ .** Without loss of generality, we may assume that  $g'(x_{(i)}), g'(x_{(i+1)}) \geq 0$  and that  $B$  changes sign. Consider the quantity  $\phi \triangleq \int_{x_{(i)}}^{x_{(i+1)}} \max\{B(t), 0\} dt$ . If  $g(x_{(i+1)}) - g(x_{(i)}) \leq \phi$ , we let  $m_i = B$  and  $M_i = \max\{B, 0\}$ .

Since, on the interval  $[x_{(i)}, x_{(i+1)}]$ ,  $B$  is piecewise linear with at most two pieces that can take on the value 0,  $B$  has at most two roots within this interval. However, since  $B(x)$  is continuous, negative for some value of  $x$ , and nonnegative at  $x \in \{x_{(i)}, x_{(i+1)}\}$ , we know  $B$  has at least two roots. Thus let  $r_1 < r_2$  be the roots of  $B(x)$ . For any choice of  $\zeta_i$ , the convex combination  $\zeta_i m_i + (1 - \zeta_i) M_i$  will be exactly  $B$  outside  $(r_1, r_2)$ . Moreover, if  $\zeta_i \neq 0$ , then this combination will be less than 0 on  $(r_1, r_2)$ , and if  $\zeta_i = 0$ , the combination will be 0 on the whole interval. Hence it suffices to only check the critical points  $r_1$  and  $r_2$ . By (11e),  $m_i(r) = M_i(r) = B(r) \in [-c_1, c_1]$  for  $r \in \{r_1, r_2\}$ , and so  $\tilde{g}$  will be  $c_1$ -bounded.

If instead  $g(x_{(i+1)}) - g(x_{(i)}) > \phi$ , we can recycle the argument from Case 1 with  $m_i = \max\{B, 0\}$  and  $M_i = U$  and conclude that  $\tilde{g}$  is  $c_1$ -bounded.

**Case 3: Both  $B$  and  $U$  change sign on  $[x_{(i)}, x_{(i+1)}]$ .** Without loss of generality, we may assume that  $g'(x_{(i)}) \geq 0, g'(x_{(i+1)}) < 0$ . Since  $B$  continuously interpolates between  $g'(x_{(i)})$  and  $g'(x_{(i+1)})$  on  $[x_{(i)}, x_{(i+1)}]$ , it must have a root  $r$ . Let  $w_i \in [x_{(i)}, x_{(i+1)}]$  be the point where  $B$  changes from one linear portion to another. Then because  $B$  is monotonic on each linear portion, the fact that  $B(w_i) \leq B(x_{(i+1)}) < 0$  means that  $B$  cannot have a root between  $[w_i, x_{(i+1)}]$  and hence has at most one root on  $[x_{(i)}, x_{(i+1)}]$ . Hence  $r$  is the unique root of  $B$ .

In a similar fashion, let us define  $s$  as the root of  $U$ , and since  $B(x) \leq U(x)$  for all  $x$ , we have  $s \geq r$ . Define

$$W(x) \triangleq \begin{cases} B(x) & x \in [x_{(i)}, r) \\ 0 & x \in [r, s] \\ U(x) & t \in (s, y], \end{cases}$$

and  $\psi \triangleq \int_{x_{(i)}}^{x_{(i+1)}} W(t) dt$ . As in Case 2, we will consider two subcases. If  $g(x_{(i+1)}) - g(x_{(i)}) \leq \psi$ , we will let  $m_i = B$  and  $M_i = W$ . By (11e),  $m_i(r) = M_i(r) = B(r) \in [-c_1, c_1]$ , and since this is the only critical point,  $\tilde{g}$  will be  $c_1$ -bounded.

For the other case, in which  $g(x_{(i+1)}) - g(x_{(i)}) > \psi$ , we choose  $m_i = W$  and  $M_i = U$ . Then (11e) imply that  $m_i(s) = M_i(s) = U(s) \in [-c_1, c_1]$ , and, since this is the only critical point, the extension is well-defined on  $(x_{(i)}, x_{(i+1)})$ .

**Defining  $\tilde{g}$  outside of the interval  $[x_1, x_{n'}]$**  It only remains to define our extension  $\tilde{g}$  outside of the interval  $[x_1, x_{n'}]$  when either  $\alpha$  or  $\beta$  is infinite. Suppose  $\alpha = -\infty$ . We extend  $\tilde{g}$  to each  $x \in (-\infty, x_1)$  using the construction

$$\tilde{g}(x) \triangleq \int_{-\infty}^x \mathbb{I}[t \in (x_1 - |g'(x_1)|/c_3, x_1)](g'(x_1) - c_3 \text{sign}(g'(x_1))t) dt.$$

This extension ensures that  $\tilde{g}'$  is  $c_2$ -bounded and  $c_3$ -Lipschitz. Moreover, the constraint (11e) guarantees that  $|\tilde{g}(x)| \leq c_1$ . Analogous reasoning establishes an extension to  $(x_{n'}, \infty)$ .  $\square$

## H Equivalence of Constrained Classical and Spanner Stein Discrepancies

For  $P$  with support  $\mathcal{X} = (\alpha_1, \beta_1) \times \cdots \times (\alpha_d, \beta_d)$  for  $-\infty \leq \alpha_j < \beta_j \leq \infty$ , Algorithm 1 computes a Stein discrepancy based on the graph Stein set

$$\begin{aligned} \mathcal{G}_{\|\cdot\|_1, Q, (V, E)} &\triangleq \left\{ g : \mathcal{X} \rightarrow \mathbb{R}^d \mid \forall x \in V, j, k \in \{1, \dots, d\} \text{ with } k \neq j, \text{ and } b_j \in \{\alpha_j, \beta_j\} \cap \mathbb{R}, \right. \\ &\max \left( \|g(x)\|_\infty, \|\nabla g(x)\|_\infty, \frac{|g_j(x)|}{|x_j - b_j|}, \frac{|\nabla_k g_j(x)|}{|x_j - b_j|}, \frac{|g_j(x) - \nabla_j g_j(x)(x_j - b_j)|}{\frac{1}{2}(x_j - b_j)^2} \right) \leq 1, \text{ and, } \forall (x, y) \in E, \\ &\left. \max \left( \frac{\|g(x) - g(y)\|_\infty}{\|x - y\|_1}, \frac{\|\nabla g(x) - \nabla g(y)\|_\infty}{\|x - y\|_1}, \frac{\|g(x) - g(y) - \nabla g(x)(x - y)\|_\infty}{\frac{1}{2}\|x - y\|_1^2}, \frac{\|g(x) - g(y) - \nabla g(y)(x - y)\|_\infty}{\frac{1}{2}\|x - y\|_1^2} \right) \leq 1 \right\}, \end{aligned}$$

Our next result shows that the graph Stein discrepancy based on a  $t$ -spanner is strongly equivalent to the classical Stein discrepancy.

**Proposition 10** (Equivalence of Constrained Classical and Spanner Stein Discrepancies). *If  $\mathcal{X} = (\alpha_1, \beta_1) \times \cdots \times (\alpha_d, \beta_d)$ , and  $G_t = (\text{supp}(Q), E)$  is a  $t$ -spanner, then*

$$\mathcal{S}(Q, \mathcal{T}_P, \mathcal{G}_{\|\cdot\|_1}) \leq \mathcal{S}(Q, \mathcal{T}_P, \mathcal{G}_{\|\cdot\|_1, Q, G_t}) \leq t^2 \kappa_d \mathcal{S}(Q, \mathcal{T}_P, \mathcal{G}_{\|\cdot\|_1}),$$

where  $\kappa_d$  is a constant, independent of  $(Q, P, G_t, t)$ , depending only on the dimension  $d$ .

### Proof

**Establishing the first inequality** Fix any  $g \in \mathcal{G}_{\|\cdot\|_1}$ ,  $z \in \text{supp}(Q)$ , and  $j, k \in \{1, \dots, d\}$  with  $k \neq j$ , and consider any  $j$ -th coordinate boundary projection point

$$b \in \{z + e_j(\alpha_j - z_j), z + e_j(\beta_j - z_j)\} \cap \mathbb{R}^d.$$

Since  $b \in \partial\mathcal{X}$ , we must have  $\langle g(b), n(b) \rangle = \langle g(b), e_j \rangle = g_j(b) = 0$ . Moreover, for each dimension  $k \neq j$ , we have  $\nabla_k g_j(x) = 0$ , since otherwise,  $\langle g(b + \delta e_k), n(b + \delta e_k) \rangle = g_j(b + \delta e_k) \neq 0$  for some  $\delta \in \mathbb{R}$  and  $b + \delta e_k \in \partial\mathcal{X}$  by the continuity of  $\nabla g_j$ .

The smoothness constraints of the classical Stein set  $\mathcal{G}_{\|\cdot\|_1}$  now imply that

$$|g_j(z)| = |g_j(z) - g_j(b)| \leq |z_j - b_j|, \quad |\nabla_k g_j(x)| = |\nabla_k g_j(z) - \nabla_k g_j(b)| \leq |z_j - b_j|,$$

and

$$|g_j(z) - \nabla_j g_j(x)(z_j - b_j)| = |g_j(b) - g_j(z) - \langle \nabla g_j(z), b - z \rangle| \leq \frac{1}{2}(z_j - b_j)^2$$

so that all graph Stein set boundary compatibility constraints are satisfied. Hence, we have the containment  $\mathcal{G}_{\|\cdot\|_1} \subseteq \mathcal{G}_{\|\cdot\|_1, Q, G_t}$ , which implies the first advertised inequality.

**Establishing the second inequality** To establish the second inequality, it suffices to show that for any  $\tilde{g} \in \mathcal{G}_{\|\cdot\|_1, Q, G_t}$ , each  $j \in \{1, \dots, d\}$ , and  $\zeta \triangleq t$ , there exists a function  $g_j$  satisfying

$$g_j(z) = \tilde{g}_j(z), \quad \nabla g_j(z) = \nabla \tilde{g}_j(z), \quad g_j(b) = 0, \quad \nabla_k g_j(b) = 0, \quad \forall k \neq j, \quad (12)$$

$$|g_j(b) - g_j(z)| \leq \|b - z\|_1, \quad (13)$$

$$\|\nabla g_j(b) - \nabla g_j(z)\|_\infty \leq \zeta \|b - z\|_1, \quad \|\nabla g_j(b) - \nabla g_j(b')\|_\infty \leq \zeta \|b - b'\|_1, \quad (14)$$

$$|g_j(b) - g_j(z) - \langle \nabla g_j(z), b - z \rangle| \leq \frac{\zeta}{2} \|b - z\|_1^2, \quad (15)$$

$$|g_j(z) - g_j(b) - \langle \nabla g_j(b), z - b \rangle| \leq \frac{3\zeta}{2} \|b - z\|_1^2, \quad \text{and} \quad (16)$$

$$|g_j(b) - g_j(b') - \langle \nabla g_j(b'), b - b' \rangle| \leq \frac{\zeta}{2} \|b - b'\|_1^2 \quad (17)$$

for all  $z \in \text{supp}(Q)$  and all  $b, b'$  in the  $j$ -th coordinate boundary set

$$B_j \triangleq \{b \in \mathbb{R}^d : b = z + e_j(\alpha_j - z_j) \text{ or } b = z + e_j(\beta_j - z_j) \text{ for some } z \in \mathcal{X}\}.$$

Indeed, since such  $g_j$  will satisfy  $\max(|g_j(z)|, \|\nabla g_j(z)\|_\infty) \leq 1$  for all  $z \in \text{supp}(Q) \cup B_j$  and

$$\max\left(\frac{|g_j(x) - g_j(y)|}{\|x - y\|_1}, \frac{\|\nabla g_j(x) - \nabla g_j(y)\|_\infty}{\|x - y\|_1}, \frac{|g_j(x) - g_j(y) - \nabla g_j(x)(x - y)|}{\frac{1}{2}\|x - y\|_1^2}, \frac{|g_j(x) - g_j(y) - \nabla g_j(y)(x - y)|}{\frac{1}{2}\|x - y\|_1^2}\right) \leq 2t^2$$

for all  $x, y \in \text{supp}(Q)$  by the argument of Appendix F, the Whitney-Glaeser extension theorem [16, Thm. 1.4] of Glaeser [15] will then imply that there exists  $g^* \in t^2 \kappa_d \mathcal{G}_{\|\cdot\|_1}$ , for a constant  $\kappa_d$  independent of  $\tilde{g}$  depending only on  $d$ , with  $g^*(z) = g(z)$  and  $\nabla g^*(z) = \nabla g(z)$  for all  $z \in \text{supp}(Q)$ . Since  $\tilde{g}$  and  $g^*$  will have matching Stein discrepancy objective values, and each objective is linear in  $g$ , the second advertised inequality will then follow.

Fix  $\tilde{g} \in \mathcal{G}_{\|\cdot\|_1, Q, G_t}$  and  $j \in \{1, \dots, d\}$ . We will now construct a function  $g_j$  satisfying the desired properties. Since  $g_j$  and  $\nabla g_j$  are determined on  $\text{supp}(Q)$ , and  $g_j$  and  $\nabla_k g_j$  are determined on  $B_j$  for  $k \neq j$  by the constraints (12), it remains to define  $\nabla_j g_j$  on  $B_j$ . We choose the extension

$$\nabla_j g_j(b) \triangleq \min_{z \in \text{supp}(Q)} \{\nabla_j g_j(z) + \zeta \|z - b\|_1\} \quad \text{for all } b \in B_j.$$

Fix any  $z \in \text{supp}(Q)$  and  $b \in B_j$ , and let  $b^* = z + e_j(b_j - z_j)$ . The argument of Appendix F implies that  $\nabla_j g_j$  is  $\zeta$ -Lipschitz on  $\text{supp}(Q)$ , and hence it is also  $\zeta$ -Lipschitz on  $\text{supp}(Q) \cup B_j$ . Since

$$|\nabla_k g_j(z) - \nabla_k g_j(b)| = |\nabla_k g_j(z)| \leq |z_j - b_j| \leq \|z - b\|_1$$

for all  $k \neq j$ , we have (14). Moreover, the boundary compatibility constraints of  $\mathcal{G}_{\|\cdot\|_1, Q, G_t}$  imply

$$|g_j(b) - g_j(z)| = |g_j(z)| \leq \|b^* - z\|_1 \leq \|b - z\|_1,$$

establishing (13). We next invoke the triangle inequality, the boundary compatibility conditions of  $\mathcal{G}_{\|\cdot\|_1, Q, G_t}$ , Hölder's inequality, the Lipschitz derivative property (14), and the fact  $\|z - b\|_1 =$

$\|b^* - z\|_1 + \|b^* - b\|_1$  in turn to establish (15):

$$\begin{aligned}
|g_j(b) - g_j(z) - \langle \nabla g_j(z), b - z \rangle| &= |g_j(z) - \nabla_j g_j(z)(z_j - b_j) - \langle \nabla g_j(z), b^* - b \rangle| \\
&\leq |g_j(z) - \nabla_j g_j(z)(z_j - b_j)| + |\langle \nabla g_j(b^*) - \nabla g_j(z), b^* - b \rangle| \\
&\leq \frac{1}{2} \|b^* - z\|_1^2 + \|\nabla g_j(b^*) - \nabla g_j(z)\|_\infty \|b^* - b\|_1 \\
&\leq \frac{1}{2} \|b^* - z\|_1^2 + \zeta \|b^* - z\|_1 \|b^* - b\|_1 \\
&\leq \frac{\zeta}{2} (\|b^* - z\|_1 + \|b^* - b\|_1)^2 = \frac{\zeta}{2} \|b - z\|_1^2.
\end{aligned}$$

A parallel argument yields (17). Finally, we may deduce (16), as

$$\begin{aligned}
|g_j(z) - g_j(b) - \langle \nabla g_j(b), z - b \rangle| &\leq |g_j(z) - \nabla_j g_j(z)(z_j - b_j)| + |\nabla_j g_j(b) - \nabla_j g_j(z)| |z_j - b_j| \\
&\leq \frac{1}{2} (z_j - b_j)^2 + \zeta \|b - z\|_1 |z_j - b_j| \leq \frac{3\zeta}{2} \|b - z\|_1^2
\end{aligned}$$

by the triangle inequality, the definition of  $\mathcal{G}_{\|\cdot\|_1, Q, G_t}$ , and the Lipschitz property (14).  $\square$
